# Supplementary material for: Search-engine-based surveillance using artificial intelligence for early detection of coronavirus disease outbreak
Source: Springer Nature journal article supplement (doi:10.1186/s40537-023-00847-9), 2023-11-11
Supplement: MOESM1 [file 26294536]

**Table S1.** Correlation coefficients of the query volumes of 32 keywords with the numbers of new cases of coronavirus disease and their query multiples (increases in query volume) from December 30, 2019 to 31 December 2019.

| **15 general keywords** | **Correlation coefficient** | **Query multiple on Dec. 31** | **8 specific keywords** | **Correlation coefficient** | **Query multiple on Dec. 31** | **9 highly specific keywords** | **Correlation coefficient** | **Query multiple on Dec. 31** |
| --- | --- | --- | --- | --- | --- | --- | --- | --- |
| **Epidemic (D)** | 0.96 | 4.53 | **Coronovirus**  **(P)** | 0.89 | 10.91 | **Novel coronavirus pneumonia (D)** | 0.95 | 0/0 |
| **Masks**  **(M)** | 0.94 | 2.05 | **Bats (P)** | 0.83 | 1.02 | **Novel coronavirus protection measures (D, M)** | 0.94 | 0/0 |
| **Influenza**  **(D)** | 0.67 | 1.20 | **Clustered pneumonia (I)** | 0.65 | 8/0 | **Novel coronavirus (P)** | 0.93 | 49.6 |
| **Avian influenza**  **(D)** | 0.61 | 1.35 | **Wildlife (P)** | 0.47 | 0.87 | **Wuhan outbreak (I)** | 0.80 | 622.71 |
| **Fever,**  **Cough,**  **Fatigue,**  **Muscle soreness,**  **Shortness of breath,**  **Respiratory distress,**  **Sore throat,**  **Dry cough,**  **Unsmooth breathing,**  **ARDS,**  **Diarrhea**  **(11 S)** | <0.1, respecrively | <1 | **SARS (D)** | 0.41 | 46.46 | **Wenliang Li (I)** | 0.43 | 10.09 |
| **Pneumonia with unknown cause (D, I)** | -0.17 | 321.5 | **Wuhan (I)** | 0.40 | 2.49 |
| **Fever with unknown cause (S, I)**  **Atypical pneumonia (D)** | <0.1, respecrively | <1 | **8 doctors’ rumor-spreading incident (I)** | 0.20 | 0/0 |
| **Wuhan Seafood Market (I)** | 0.11 | 241 |
| **Wuhan Huanan Seafood Market (I)** | 0.09 | 93.76 |
| **Total:**  **3D, 1M, 11S** | **>0.6**： 3D, 1M;  **<0.6:** 11 S | **(2,10):** 1D, 1M;  **<2:** 2D, 11S | **Total:**  **3D, 3I, 3P, 1S** | >0.6： 1I, 2P;  <0.6:3D, 2I, 1P, 1S | **>100：** 1D, 1I;  **(10,100)**: 1D, 1I, 1P;  **<2:** 1D, 1I, 2P, 1S | **Total: 2D, 6I, 1M, 1P** | >0.6： 2D, 1I, 1M, 1P;  <0.6: 5I | **>100**: 2I;  **(10, 100)**: 2I, 1P;  (2,10): 1I;  <2: 2D, 1I, 1M |
| **Total:**  **8D, 9I, 2M, 4P, 12S** | **Correlation coefficients:**  **>0.6：** 5D, 2I, 2M, 3P;  **<0.6:** 3D, 7I, 1P, 12S | | | **Query multiple on Dec. 31:**  **>100：** 1D, 3I;  **(10,100)**: 1D, 3I, 2P;  **(2,10):** 1D, 1I, 1M;  **<2:** 5D, 2I, 1M, 2P,12S | | | | |

Abbreviation: Symptoms (S), Infectious disease index (D), Pathogen and potential host (P), Protective measures (M), Incidents (I)
